# Supplementary material for: Optimizing a reliable ex vivo human blood model to analyze expression of Staphylococcus epidermidis genes
Source: PeerJ. 2020 Jun 15;8:e9295. doi: 10.7717/peerj.9295 (PMC7301895; doi:10.7717/peerj.9295)
Supplement: Supplemental Information 1 [file peerj-08-9295-s003.xlsx]

## Sheet: 10E8
	Staphylococcus epidermidis PT12003
	Nº assays:	5
	Nº donors:	5
	Initial concentration:		100000000
							CFU/mL
		Assay	Donor	Gender	Age range	Technical replicates	T0h	T4h	T8h
		1	J	Female	25-30	1	460000000	250000000	350000000
						2	490000000	350000000	380000000
						3	480000000	300000000	350000000
		2	C	Female	25-30	1	240000000	160000000	420000000
						2	290000000	160000000	360000000
						3	240000000	230000000	440000000
		3	K	Male	20-25	1	290000000	140000000	350000000
						2	240000000	160000000	390000000
						3	320000000	120000000	450000000
		4	E	Female	25-30	1	320000000	330000000	450000000
						2	280000000	360000000	460000000
						3	320000000	380000000	470000000
		5	I	Female	30-35	1	370000000	270000000	360000000
						2	300000000	290000000	450000000
						3	300000000	210000000	400000000

## Sheet: 10E7
	Staphylococcus epidermidis PT12003
	Nº assays:	5
	Nº donors:	5
	Initial concentration:		10000000
								CFU/mL
		Assay	Donor	Gender	Age range	Technical replicates	T0h	T4h	T8h
		1	J	Female	25-30	1	46000000	32000000	20000000
						2	41000000	38000000	28000000
						3	nd	20000000	22000000
		2	C	Female	25-30	1	18000000	10000000	22000000
						2	26000000	14000000	20000000
						3	24000000	17000000	18000000
		3	K	Male	20-25	1	13000000	4000000	3000000
						2	15000000	5000000	3000000
						3	20000000	6000000	nd
		4	E	Female	25-30	1	35000000	50000000	11000000
						2	25000000	52000000	9000000
						3	28000000	47000000	7000000
		5	I	Female	30-35	1	26000000	17000000	21000000
						2	31000000	14000000	22000000
						3	32000000	24000000	25000000

## Sheet: 10E6
	Staphylococcus epidermidis PT12003
	Nº assays:	5
	Nº donors:	5
	Initial concentration:		1000000
								CFU/mL
		Assay	Donor	Gender	Age range	Technical replicates	T0h	T4h	T8h
		1	J	Female	25-30	1	3500000	900000	150000
						2	3600000	800000	170000
						3	3900000	1000000	200000
		2	C	Female	25-30	1	2200000	230000	800000
						2	2600000	230000	100000
						3	1900000	300000	150000
		3	K	Male	20-25	1	1500000	300000	5000
						2	2000000	400000	4000
						3	1600000	300000	2000
		4	E	Female	25-30	1	2400000	3000000	300000
						2	2800000	3900000	300000
						3	2800000	3700000	200000
		5	I	Female	30-35	1	3100000	1700000	3200000
						2	3200000	2000000	2700000
						3	2900000	1000000	1700000

## Sheet: 10E5
	Staphylococcus epidermidis PT12003
	Nº assays:	5
	Nº donors:	5
	Initial concentration:		100000
								CFU/mL
		Assay	Donor	Gender	Age range	Technical replicates	T0h	T4h	T8h
		1	J	Female	25-30	1	100000	10000	1900
						2	90000	6000	2400
						3	100000	7000	2100
		2	C	Female	25-30	1	160000	8000	0
						2	160000	12000	0
						3	240000	5000	0
		3	K	Male	20-25	1	160000	14000	0
						2	130000	16000	0
						3	110000	13000	0
		4	E	Female	25-30	1	330000	170000	53000
						2	250000	90000	42000
						3	300000	40000	39000
		5	I	Female	30-35	1	150000	150000	12000
						2	220000	120000	11000
						3	220000	70000	nd

## Sheet: 10E4
	Staphylococcus epidermidis PT12003
	Nº assays:	5
	Nº donors:	5
	Initial concentration:		10000
								CFU/mL
		Assay	Donor	Gender	Age range	Technical replicates	T0h	T4h	T8h
		1	J	Female	25-30	1	13000	11000	1400
						2	17000	10000	1900
						3	15000	8000	1400
		2	C	Female	25-30	1	20000	200	0
						2	16000	200	0
						3	10000	100	0
		3	K	Male	20-25	1	16000	3000	0
						2	16000	2000	0
						3	13000	3000
		4	E	Female	25-30	1	29000	4600	3000
						2	31000	4200	2500
						3	26000	3900	2700
		5	I	Female	30-35	1	22000	700	0
						2	17000	1200	0
