# Supplementary material for: Optimizing a reliable ex vivo human blood model to analyze expression of Staphylococcus epidermidis genes
Source: PeerJ. 2020 Jun 15;8:e9295. doi: 10.7717/peerj.9295 (PMC7301895; doi:10.7717/peerj.9295)
Supplement: Supplemental Information 2 [file peerj-08-9295-s004.xlsx]

## Sheet: Leukocytes
	Nº assays:	3
	Nº donors:	3
							Total cells			Dead leukocytes
	T0h	Assay	Donor	Gender	Age range	Technical replicates	Counts/µl	Dilution	Total Counts	PI+ (%)	Counts/µl	Dilution	Total Counts
		1	A	Female	35-40	1	380	2	760000	0.0151	6	2	12000
						2	182	4	728000	0.0172	3	4	12000
		2	J	Female	25-30	1	326	10	3260000	0.0504	16	10	160000
						2	325	10	3250000	0.0551	18	10	180000
		3	N	Male	35-40	1	156	2	312000	0.0242	4	2	8000
						2	154	2	308000	0.0089	1	2	2000
						3	145	2	290000	0.0211	3	2	6000
							Total cells			Dead leukocytes
	T4h	Assay	Donor	Gender	Age range	Technical replicates	Counts/µl	Dilution	Total Counts	PI+ (%)	Counts/µl	Dilution	Total Counts
		1	A	Female	35-40	1	685	4	2740000	0.0459	31	4	124000
						2	531	5	2655000	0.0482	26	5	130000
						3	286	10	2860000	0.0606	17	10	170000
		2	J	Female	25-30	1	269	10	2690000	0.0717	19	10	190000
						2	271	10	2710000	0.0776	21	10	210000
		3	N	Male	35-40	1	549	4	2196000	0.0252	14	4	56000
						2	594	4	2376000	0.0262	16	4	64000
							Total cells			Dead leukocytes
	T8h	Assay	Donor	Gender	Age range	Technical replicates	Counts/µl	Dilution	Total Counts	PI+ (%)	Counts/µl	Dilution	Total Counts
		1	A	Female	35-40	1	590	10	5900000	0.0991	58	10	580000
						2	292	4	1168000	0.1065	31	4	124000
		2	J	Female	25-30	1	170	10	1700000	0.1726	19	10	190000
						2	167	10	1670000	0.1759	29	10	290000
		3	N	Male	35-40	1	547	4	218800	0.1566	86	4	344000
						2	553	4	221200	0.1641	91	4	364000

## Sheet: Bacteria
	Staphylococcus epidermidis PT12003
	Nº assays:	3
	Nº donors:	3
	Initial concentration:		100000
	Time of incubation:		4
							Time after blood collection
		Assay	Donor	Gender	Age range	Technical replicates	T0H	T4H
		1	A	Female	35-40	1	170000	14000
						2	160000	12000
		2	J	Female	25-30	1	240000	3300
						2	240000	6000
		3	E	Male	35-40	1	210000	2800
						2	220000	2600
						3	180000	3500
							Time after blood collection
		Assay	Donor	Gender		Technical replicates	T4H	T8H
		1	A	Female	35-40	1	140000	40000
						2	140000	26000
						3	140000	40000
		2	J	Female	35-40	1	140000	240000
						2	130000	180000
						3	100000	240000
		3	E	Male	35-40	1	130000	10000
						2	140000	9000
						3	160000	13000
