# Supplementary material for: Optimizing a reliable ex vivo human blood model to analyze expression of Staphylococcus epidermidis genes
Source: PeerJ. 2020 Jun 15;8:e9295. doi: 10.7717/peerj.9295 (PMC7301895; doi:10.7717/peerj.9295)
Supplement: Supplemental Information 3 [file peerj-08-9295-s005.xlsx]

## Sheet: A (CFUmL)
	Staphylococcus epidermidis PT12003
	Nº assays:	2
	Nº donors:	2
	0 Hours	Donor	Gender	Age range	Assay	Technical replicates	TSB	K3EDTA	Heparin	Citrato sodium
		J	Female	25-30	1	1	49300000	47000000	40000000	40000000
						2	40000000	46000000	40000000	39000000
		M	Male	25-30	2	1	40000000	56000000	46000000	63000000
						2	44800000	58000000	52000000	58000000
	2 Hours	Donor	Gender	Age range	Assay	Technical replicates	TSB	K3EDTA	Heparin	Citrato sodium
		J	Female	25-30	1	1	69700000	34000000	60000000	29000000
						2	58000000	39000000	62000000	32000000
		M	Male	25-30	2	1	58200000	35000000	44000000	55000000
						2	62000000	30000000	36000000	45000000
	4 Hours	Donor	Gender	Age range	Assay	Technical replicates	TSB	K3EDTA	Heparin	Citrato sodium
		J	Female	25-30	1	1	375000000	41000000	270000000	280000000
						2	380000000	36000000	350000000	250000000
		M	Male	25-30	2	1	388000000	30000000	250000000	300000000
						2	382000000	42000000	140000000	350000000
	6 Hours	Donor	Gender	Age range	Assay	Technical replicates	TSB	K3EDTA	Heparin	Citrato sodium
		J	Female	25-30	1	1	2590000000	34000000	1400000000	1000000000
						2	1850000000	38000000	1300000000	1600000000
		M	Male	25-30	2	1	2000000000	27000000	2100000000	3300000000
						2	1900000000	22000000	1900000000	3300000000
	8 Hours	Donor	Gender	Age range	Assay	Technical replicates	TSB	K3EDTA	Heparin	Citrato sodium
		J	Female	25-30	1	1	3170000000	24000000	2000000000	3100000000
						2	3200000000	38000000	1200000000	3000000000
		M	Male	25-30	2	1	3380000000	44000000	3200000000	3300000000
						2	3400000000	32000000	3300000000	1900000000
	24 Hours	Donor	Gender	Age range	Assay	Technical replicates	TSB	K3EDTA	Heparin	Citrato sodium
		J	Female	25-30	1	1	4800000000	3400000	5000000000	4500000000
						2	4000000000	2900000	4000000000	3800000000
		M	Male	25-30	2	1	3480000000	3000000	4900000000	4400000000
						2	4200000000	3000000	4000000000	5500000000

## Sheet: B (gene expression)
	Staphylococcus epidermidis PT12003
	Nº assays:	2
	Nº donors:	2
	nd	not detected
							Normalized expression to 16S rRNA
	SERP_RS11970	Donor	Gender	Age range	Assay	Technical replicates	Blood w/ anticoagulant	K3EDTA	Citrato sodium	Heparin
		J	Female	25-30	1	1	8.75217e-05	1.93139e-05	5.62937e-05	7.08437e-05
						2	7.41086e-05	1.93139e-05	4.7998e-05	6.12471e-05
						3	9.1873e-05	2.08441e-05	7.0762e-05	7.97034e-05
		M	Male	25-30	2	1	0.00273041	2.18804e-05	2.49604e-05	3.78329e-05
						2	0.00440493	4.99208e-05	2.90722e-05	2.8672e-05
						3	0.00130959	2.18804e-05	2.80819e-05	3.57921e-05
							Normalized expression to 16S rRNA
	SERP_RS10985	Donor	Gender	Age range	Assay	Technical replicates	Blood w/ anticoagulant	K3EDTA	Citrato sodium	Heparin
		J	Female	25-30	1	1	0.0102374	0.000141197	0.000105778	0.000707491
						2	0.0143779	0.000140222	0.000258658	0.000444663
						3	0.014082	nd	nd	0.000547444
		M	Male	25-30	2	1	1.38831	3.15938e-05	9.51129e-05	6.86681e-05
						2	1.79419	2.15792e-05	0.000107008	0.000110781
						3	1.43727	3.8361e-05	nd	0.000127254
							Normalized expression to 16S rRNA
	SERP_RS08870	Donor	Gender	Age range	Assay	Technical replicates	Blood w/ anticoagulant	K3EDTA	Citrato sodium	Heparin
		J	Female	25-30	1	1	2.9478e-05	1.56878e-05	2.99587e-05	3.71829e-05
						2	2.14301e-05	1.22561e-07	3.41758e-05	5.07934e-05
						3	2.34509e-05	2.29682e-05	2.75676e-05	4.2712e-05
		M	Male	25-30	2	1	0.000368342	1.08646e-05	1.16444e-05	1.41386e-05
						2	nd	1.41386e-05	9.99751e-06	1.26544e-05
						3	nd	1.28311e-05	1.44357e-05	1.3944e-05
